# Supplementary material for: Moth oviposition shapes the species-specific transcriptional and phytohormonal response of Nicotiana attenuata to larval feeding
Source: PubMed Central journal article supplement (PMC6035172; doi:10.1038/s41598-018-28233-z), 2018-07-06
Supplement: 41598_2018_28233_MOESM1_ESM.pdf [file 41598_2018_28233_MOESM1_ESM.pdf]

## Supplementary Information

Title of the study: "Moth oviposition shapes the species-specific transcriptional and phytohormonal response of *Nicotiana attenuata* to larval feeding"

Authors: Drok, S., Bandoly, M., Stelzer, S., Lortzing, T., Steppuhn, A.

### Content

#### Supplementary Figures

**Figure S1.** Levels of phytohormones in *N. attenuata* in response to oviposition and/or feeding by lepidopteran larvae.

**Figure S2.** Numbers of genes regulated in *N. attenuata* plants by feeding and oviposition.

**Figure S3.** Correlations of the transcriptomic changes in response to feeding by either of two moth species with those in the cross-species treatments.

**Figure S4.** Expression patterns of genes analysed by microarray analysis and by qPCR.

**Figure S5.** Expression patterns of genes analysed by microarray analysis and by qPCR (including all feeding-induced treatments).

#### Supplementary Tables

**Table S1.** Genes that are significantly regulated in response to oviposition by either of two moth species in systemic leaves of *N. attenuata*.

**Table S2.** Effects of oviposition and feeding by either of two moth species on phytohormone levels of *N. attenuata*.

**Table S3.** Effects of oviposition and feeding by either of two moth species on gene expression quantified by qPCR

**Table S4.** Differences between all treatments involving larval feeding in gene expression quantified by qPCR.

**Table S5.** Annotation and primer information for the genes selected for qPCR analysis.

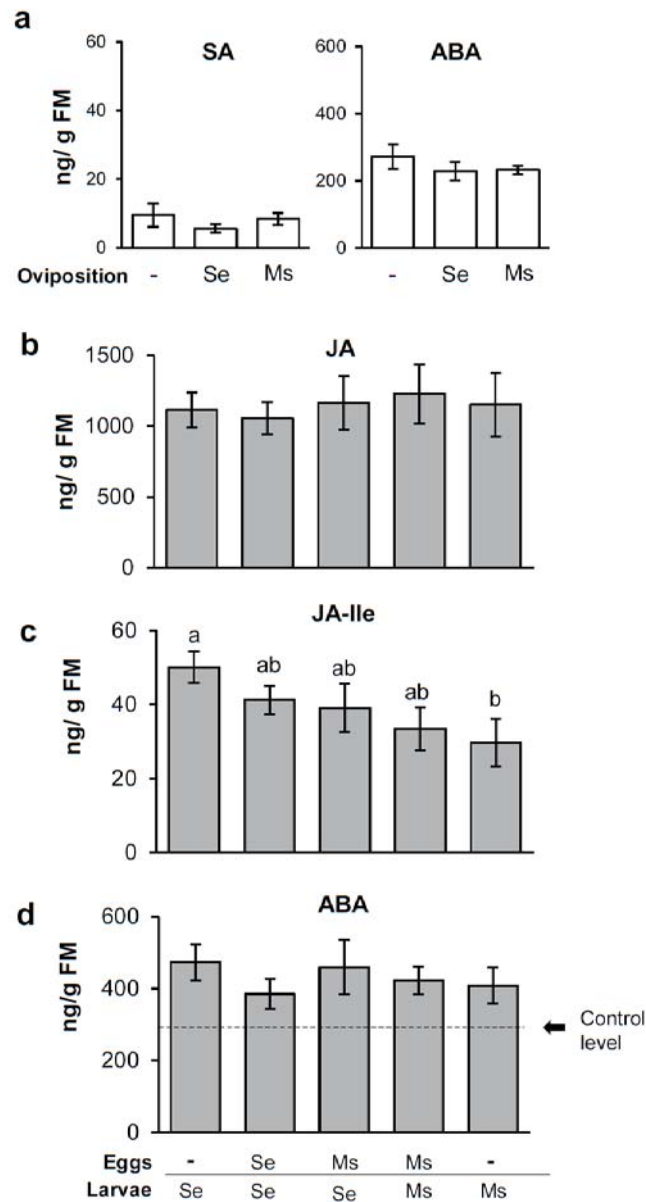

**Figure S1.** Levels of phytohormones in *N. attenuata* in response to oviposition and/or feeding by lepidopteran larvae. Mean content  $\pm$  SEM of (a) salicylic acid (SA) and abscisic acid (ABA) in plants without (-) or with prior oviposition by *S. exigua* (Se) or *M. sexta* (Ms) at a lower leaf. Content of (b) jasmonic acid (JA), (c) the JA-conjugate with isoleucine (JA-Ile) and (d) ABA in *N. attenuata* leaves that were *S. exigua*- or *M. sexta*-fed for 24 hours. The plants were previously oviposited by either of the two species or not. An arrow demarks the ABA level of untreated control plants, which had JA and JA-Ile levels below the limit of quantification. All significant differences according to Kruskal Wallis analysis and pairwise Wilcoxon tests ( $P < 0.05$ ) are marked by different letters.

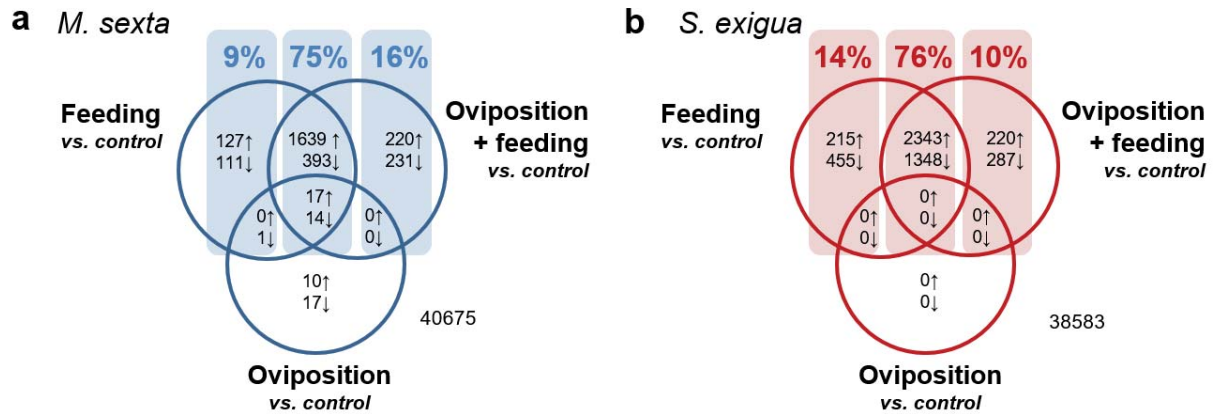

**Figure S2.** Numbers of genes regulated in *N. attenuata* plants by feeding and oviposition. Venn diagrams display the numbers of genes that were significantly up(↑) and down(↓)-regulated by oviposition and larval feeding of either **(a)** *M. sexta* or **(b)** *S. exigua* larvae (relative to untreated control plants) at  $P < 0.05$  after correction for false discovery rate and with a  $\log_2$ -fold change (FC)  $> 1$  in the microarray analysis.

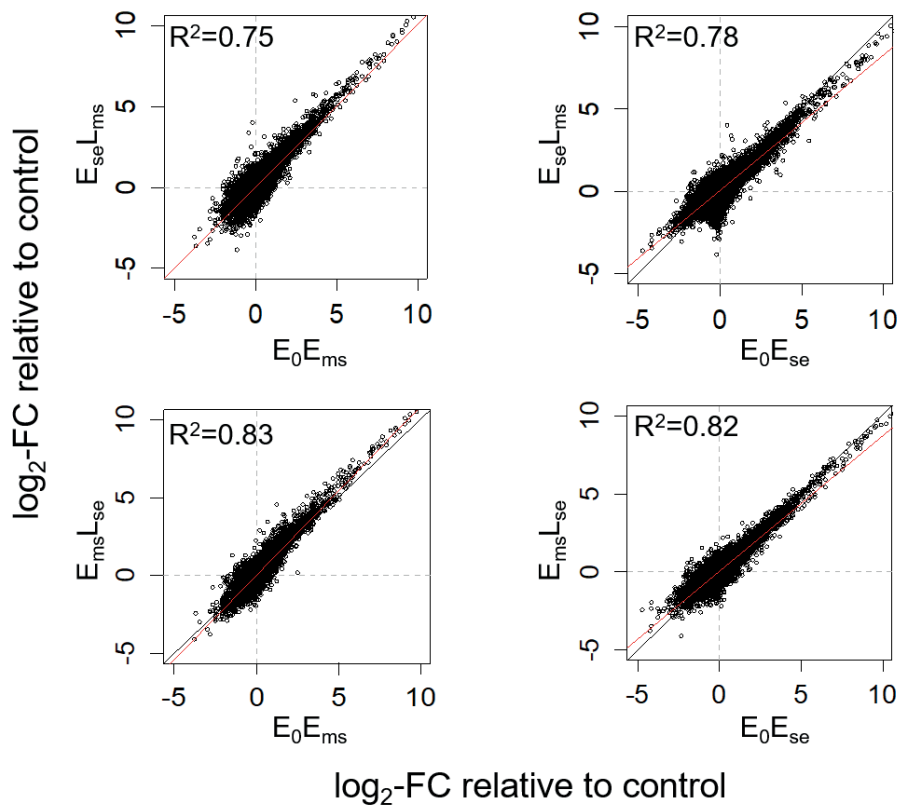

**Figure S3.** Correlations of the transcriptomic changes in response to feeding by either of two moth species with those in the cross-species treatments. Scatter plots of the  $\log_2$ -fold change (FC) in the transcript expression in pairwise comparisons of feeding-induced *N. attenuata* plants. Red lines signify the linear regression at the given coefficient of determination ( $R^2$ ).

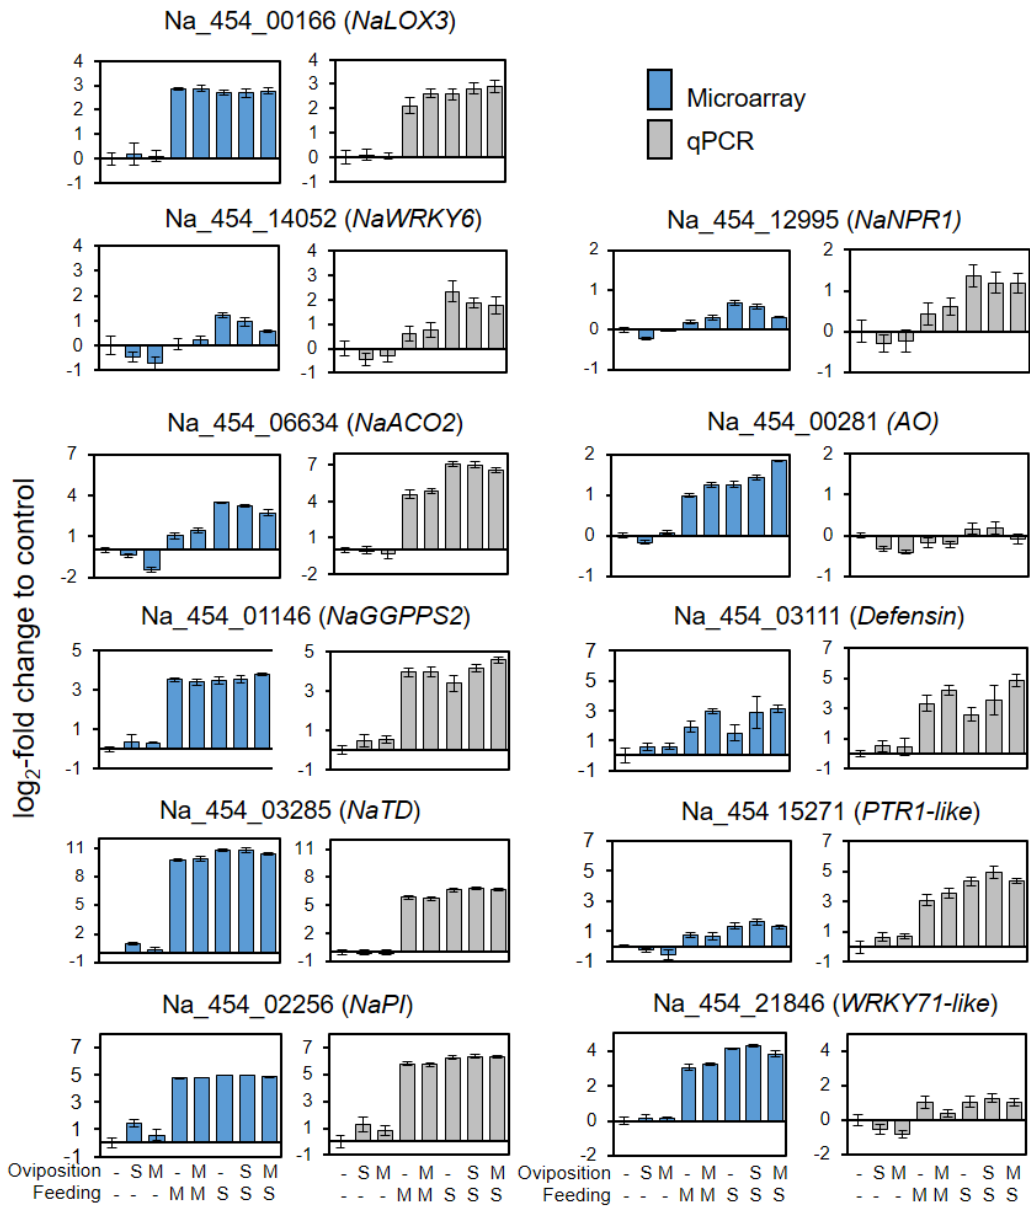

**Figure S4.** Expression patterns of genes analysed by microarray (blue bars, N = 3) and by qPCR (N = 9-10, normalized to  $\beta$ -actin and *EFla* as reference genes). Transcript accumulation (mean  $\pm$  SEM) displayed as  $\log_2$ -fold change relative to untreated control plants (--) in leaves of plants previously oviposited by *S. exigua* (S) or *M. sexta* (M) and non-oviposited (-) plants that were exposed to larval feeding or not. Statistics are provided in the corresponding main figures (Fig. 5 and Fig. 6) and in Table S3.

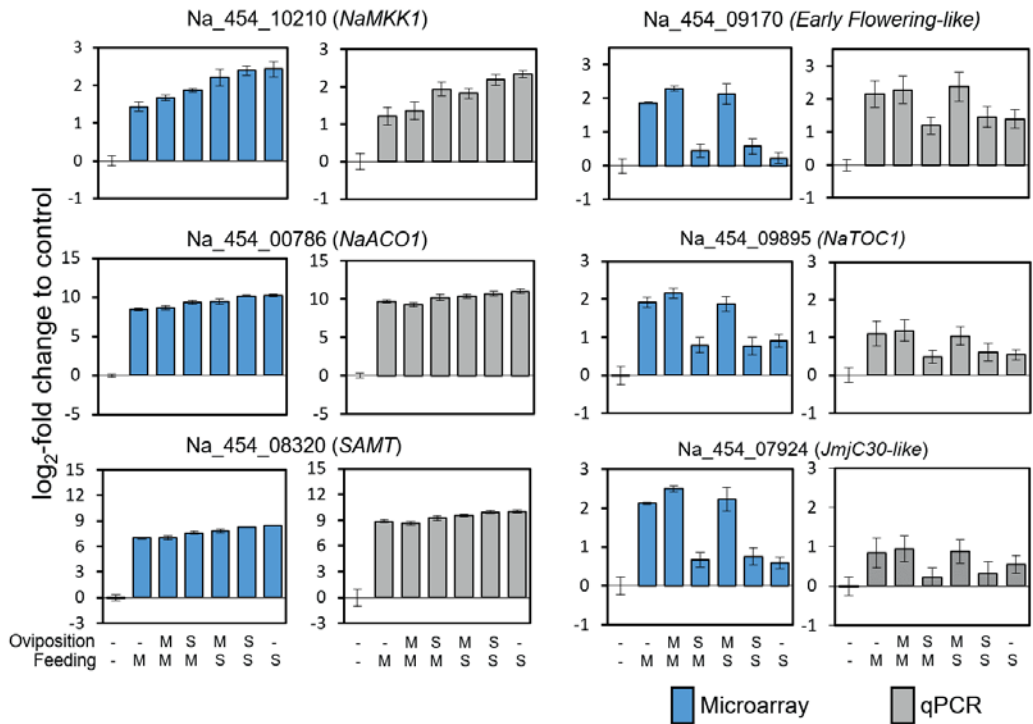

**Figure S5.** Expression patterns of genes analysed by microarray (blue bars, N = 3) and by qPCR (N = 9-10, normalized to  $\beta$ -actin and *EFl $\alpha$*  as reference genes). Transcript accumulation (mean  $\pm$  SEM) displayed as log<sub>2</sub>-fold change relative to untreated control plants (--) in leaves of plants previously oviposited by *S. exigua* (S) or *M. sexta* (M) and non-oviposited (-) plants that were exposed to larval feeding or not. Statistics are provided in Table S4.

**Table S1: Genes that are significantly regulated in response to oviposition by *M. sexta* in systemic leaves of *N. attenuata*.** Asterisks (\*/\*\*) indicate significant differences at  $P < 0.05/0.01$  according to linear models and corrected for false discovery rate after Benjamini-Hochberg ( $N = 3$  pools of 3 - 4 plants).

| Class                               | Oligo ID     | Log <sub>2</sub> -FC | P-value                                         | Description                                                                                  |                                                                                                     |
|-------------------------------------|--------------|----------------------|-------------------------------------------------|----------------------------------------------------------------------------------------------|-----------------------------------------------------------------------------------------------------|
| <b>Amino acid metabolism</b>        | Na_454_29928 | -3.56                | *                                               | subtilisin-like protease SBT2.5                                                              |                                                                                                     |
|                                     | Na_454_02188 | -1.54                | *                                               | kunitz-type inhibitor d                                                                      |                                                                                                     |
|                                     | Na_454_12786 | -1.01                | *                                               | 14 kda proline-rich                                                                          |                                                                                                     |
|                                     | Na_454_04357 | 1                    | *                                               | miraculin-like                                                                               |                                                                                                     |
|                                     | Na_454_21019 | 1.05                 | *                                               | non-specific lipid-transfer protein 2-like                                                   |                                                                                                     |
| <b>Auxin-induced</b>                | Na_454_13992 | 1.06                 | *                                               | auxin-induced protein 15a-like                                                               |                                                                                                     |
|                                     | Na_454_15320 | 1.13                 | *                                               | auxin-induced protein 15a-like                                                               |                                                                                                     |
| <b>Cell wall modification</b>       | Na_454_07546 | -1.61                | *                                               | protein asc1-like                                                                            |                                                                                                     |
|                                     | Na_454_08203 | 1.53                 | **                                              | expansin precursor                                                                           |                                                                                                     |
|                                     | Na_454_11643 | -1.38                | *                                               | expansin-like b1                                                                             |                                                                                                     |
| <b>Cytochrome P450</b>              | Na_454_17662 | -1.44                | *                                               | premnaspirodiene oxygenase-like                                                              |                                                                                                     |
|                                     | Na_454_02033 | -1.33                | *                                               | <i>Nicotiana tabacum</i> elicitor-inducible cytochrome P450 (CYP71D20)                       |                                                                                                     |
|                                     | Na_454_24013 | -1.05                | *                                               | premnaspirodiene oxygenase-like                                                              |                                                                                                     |
| <b>Development unspecified</b>      | Na_454_13453 | 1.29                 | *                                               | probable transporter mch1                                                                    |                                                                                                     |
|                                     | Na_454_15927 | 1.07                 | *                                               | probable transporter mch1                                                                    |                                                                                                     |
|                                     | Na_454_23210 | -1.14                | *                                               | phytosulfokines 3-like                                                                       |                                                                                                     |
| <b>Ethylene signal transduction</b> | Na_454_09841 | -1.55                | **                                              | ethylene-responsive transcription factor 1                                                   |                                                                                                     |
|                                     | Na_454_06634 | -1.45                | **                                              | <i>N. attenuata</i> 1-aminocyclopropane-1-carboxylate oxidase (NaACO2b)                      |                                                                                                     |
| <b>Regulation of transcription</b>  | Na_454_26191 | -1.2                 | *                                               | ethylene response factor 4                                                                   |                                                                                                     |
|                                     | Na_454_13961 | -1.44                | **                                              | probable serine threonine-protein kinase at1g18390                                           |                                                                                                     |
|                                     | Na_454_01573 | -1.19                | *                                               | casp-like protein pimp1                                                                      |                                                                                                     |
|                                     | Na_454_20188 | 1.44                 | *                                               | <i>N. attenuata</i> jasmonate ZIM domain protein f                                           |                                                                                                     |
|                                     | Na_454_17026 | 1.53                 | **                                              | glycine rich protein-interacting protein                                                     |                                                                                                     |
|                                     | Na_454_16844 | 1.67                 | **                                              | <i>N. attenuata</i> timing of cab expression 1/pseudo-response regulator 1 (TOC1/PRR1)       |                                                                                                     |
|                                     | Na_454_15118 | 1.83                 | *                                               | protein early flowering 4-like                                                               |                                                                                                     |
|                                     | Na_454_09895 | 2.14                 | **                                              | <i>N. attenuata</i> timing of cab expression 1/pseudo-response regulator 1 (TOC1/PRR1)       |                                                                                                     |
|                                     | Na_454_07924 | 2.55                 | **                                              | PREDICTED: <i>N. attenuata</i> lysine-specific demethylase JMJ30 (LOC109220083)              |                                                                                                     |
|                                     | <b>Other</b> | Na_454_12179         | 1.21                                            | **                                                                                           | probable starch synthase chloroplastic amyloplastic isoform x1                                      |
| Na_454_25391                        |              | -2.24                | *                                               | glutathione s-transferase u10-like                                                           |                                                                                                     |
| Na_454_19395                        |              | 1.36                 | *                                               | PREDICTED: <i>Nicotiana tomentosiformis</i> pathogenesis-related protein PR-1 (LOC104101123) |                                                                                                     |
| Na_454_08441                        |              | -1.63                | **                                              | protein plant cadmium resistance 2-like                                                      |                                                                                                     |
| Na_454_14188                        |              | -1.37                | **                                              | hypothetical protein POPTR_0018s05900g                                                       |                                                                                                     |
| Na_454_11566                        |              | -1.09                | *                                               | upf0392 protein rcom_0530710-like                                                            |                                                                                                     |
| Na_454_17107                        |              | 1.02                 | *                                               | GDSL esterase/lipase                                                                         |                                                                                                     |
| <b>Not assigned</b>                 |              | Na_454_10847         | -1.1                                            | *                                                                                            | <i>Nicotiana tomentosiformis</i> uncharacterized LOC104114715 (LOC104114715)                        |
|                                     |              | Na_454_19303         | -1.32                                           | *                                                                                            | PREDICTED: <i>Nicotiana sylvestris</i> putative uncharacterized protein DDB_G0292636 (LOC104222448) |
|                                     |              | Na_454_02938         | 1.19                                            | *                                                                                            | PREDICTED: uncharacterized protein LOC104109237                                                     |
|                                     | Na_454_19036 | 1.56                 | *                                               | PREDICTED: uncharacterized protein LOC104113476 isoform X1                                   |                                                                                                     |
|                                     | Na_454_09001 | 1.46                 | *                                               | PREDICTED: uncharacterized protein LOC104245511                                              |                                                                                                     |
|                                     | Na_454_33970 | 1.2                  | *                                               | PREDICTED: uncharacterized protein LOC104245511                                              |                                                                                                     |
|                                     | Na_454_21980 | 1.19                 | *                                               | PREDICTED: uncharacterized protein LOC104225873 isoform X2                                   |                                                                                                     |
|                                     | Na_454_13724 | 1.16                 | *                                               | PREDICTED: uncharacterized protein LOC104114536                                              |                                                                                                     |
|                                     | Na_454_04191 | -1.02                | *                                               | PREDICTED: uncharacterized protein LOC104243756                                              |                                                                                                     |
|                                     | Na_454_23235 | -1.04                | *                                               | PREDICTED: uncharacterized protein LOC104095139                                              |                                                                                                     |
|                                     | Na_454_15406 | -1.12                | *                                               | PREDICTED: uncharacterized LOC104236994 (LOC104236994)                                       |                                                                                                     |
|                                     | Na_454_26475 | -1.14                | *                                               | PREDICTED: uncharacterized protein LOC104216739                                              |                                                                                                     |
|                                     | Na_454_17182 | -1.22                | *                                               | PREDICTED: uncharacterized protein LOC104229087                                              |                                                                                                     |
| Na_454_14832                        | -2.22        | **                   | PREDICTED: uncharacterized protein LOC104240675 |                                                                                              |                                                                                                     |

Table S1 continued

| Class        | Oligo ID     | Log <sub>2</sub> -FC | P-value | Description  |
|--------------|--------------|----------------------|---------|--------------|
| Not assigned | Na_454_09642 | 1.06                 | **      | Not assigned |
|              | Na_454_38350 | 1.32                 | **      | Not assigned |
|              | Na_454_38683 | 1.18                 | *       | Not assigned |
|              | Na_454_15404 | 1.15                 | *       | Not assigned |
|              | Na_454_34315 | 1.12                 | *       | Not assigned |
|              | Na_454_26831 | -1.5                 | *       | Not assigned |
|              | Na_454_11392 | -1.94                | *       | Not assigned |
|              | Na_454_22052 | -1.98                | **      | Not assigned |
|              | Na_454_12337 | -2.04                | *       | Not assigned |
|              | Na_454_34486 | -2.14                | *       | Not assigned |
|              | Na_454_43165 | -2.52                | *       | Not assigned |

**Table S2: Effects of oviposition and feeding by either of two moth species on phytohormone levels of *N. attenuata*.** In separate LMMs for each species (*S. exigua* or *M. sexta*) we tested for effects of the factors oviposition and herbivory and their interaction on *N. attenuata*'s phytohormone levels. The replicate blocks were included as random factor. Significant differences are emphasised in bold and reveal a significant effect of herbivory but no effect of the oviposition on all assessed phytohormones (N = 9 - 11).

|           |                 | <i>S. exigua</i> |                |              | <i>M. sexta</i> |                |              |
|-----------|-----------------|------------------|----------------|--------------|-----------------|----------------|--------------|
|           |                 | Eggs             | Feeding        | Eggs*feeding | Eggs            | Feeding        | Eggs*feeding |
| SA        | <i>F</i> -value | 0.3              | 89             | 0.4          | 1.2             | 17.2           | 2.4          |
| ng / g FM | <i>P</i> -value | 0.4206           | < <b>0.001</b> | 0.5384       | 0.06            | < <b>0.001</b> | 0.123        |
| ABA       | <i>F</i> -value | 2.7              | 32             | 0.1          | 0.1             | 25.6           | 0.8          |
| ng / g FM | <i>P</i> -value | 0.359            | < <b>0.001</b> | 0.713        | 0.682           | < <b>0.001</b> | 0.361        |
| JA        | <i>F</i> -value | 0.1              | 186.6          | 0.1          | 0.5             | 74.8           | 0.5          |
| ng / g FM | <i>P</i> -value | 0.998            | < <b>0.001</b> | 0.725        | 0.331           | < <b>0.001</b> | 0.492        |
| JA-Ile    | <i>F</i> -value | 2.1              | 265.8          | 2.1          | 0.7             | 64.8           | 0.7          |
| ng / g FM | <i>P</i> -value | 0.999            | < <b>0.006</b> | 0.147        | 0.224           | < <b>0.001</b> | 0.389        |

**Table S3: Effects of oviposition and feeding by either of two moth species on gene expression quantified by qPCR.** We evaluated the effects of feeding and oviposition by either *S. exigua* and *M. sexta* on transcript accumulation of *N. attenuata* genes using a LMM. The replicate blocks were included as random factor. Significant differences are emphasised in bold (N = 9 - 11). Additionally, we tested whether feeding by both species elicited different gene expression levels using Welch's *t*-test (right columns). Log<sub>2</sub>-fold changes in gene expression relative to control plants are presented in Fig. 5, 6 and Fig. S4.

|                                      |                 | <i>M. sexta</i>   |                   |                  | <i>S. exigua</i> |                   |                  | <i>M.sexta</i> feeding vs.<br><i>S.exigua</i> feeding |                   |
|--------------------------------------|-----------------|-------------------|-------------------|------------------|------------------|-------------------|------------------|-------------------------------------------------------|-------------------|
|                                      |                 | Eggs              | Feeding           | Eggs*<br>feeding | Eggs             | Feeding           | Eggs*<br>feeding | <i>t</i>                                              |                   |
| <b>Na_454_00166</b><br>(Na_LOX3)     | <i>F</i> -value | 1.38              | 129.14            | 2.63             | 1.83             | 292.51            | 1.19             | <i>t</i>                                              | -1.23             |
|                                      | df              | 1                 | 1                 | 1                | 1                | 1                 | 1                | df                                                    | 16                |
|                                      | <i>P</i> -value | 0.240             | <b>&lt; 0.001</b> | 0.105            | 0.177            | <b>&lt; 0.001</b> | 0.276            | <i>P</i> -value                                       | 0.237             |
| <b>Na_454_00281</b><br>(AO)          | <i>F</i> -value | 5.73              | 0.24              | 7.92             | 0.51             | 11.36             | 4.01             | <i>t</i>                                              | -1.81             |
|                                      | df              | 1                 | 1                 | 1                | 1                | 1                 | 1                | df                                                    | 18                |
|                                      | <i>P</i> -value | <b>0.017</b>      | 0.623             | <b>0.005</b>     | 0.474            | <b>&lt; 0.001</b> | <b>0.045</b>     | <i>P</i> -value                                       | 0.088             |
| <b>Na_454_01146</b><br>(NaGGPPS2)    | <i>F</i> -value | 4.72              | 558.34            | 2.15             | 14.42            | 253.83            | 0.54             | <i>t</i>                                              | 1.60              |
|                                      | df              | 1                 | 1                 | 1                | 1                | 1                 | 1                | df                                                    | 12                |
|                                      | <i>P</i> -value | <b>0.030</b>      | <b>&lt; 0.001</b> | 0.143            | <b>0.001</b>     | <b>&lt; 0.001</b> | 0.463            | <i>P</i> -value                                       | 0.138             |
| <b>Na_454_02256</b><br>(NaPI)        | <i>F</i> -value | 3.89              | 301.35            | 1.18             | 5.44             | 335.65            | 3.00             | <i>t</i>                                              | -2.11             |
|                                      | df              | 1                 | 1                 | 1                | 1                | 1                 | 1                | df                                                    | 18                |
|                                      | <i>P</i> -value | 0.314             | <b>&lt; 0.001</b> | 0.278            | <b>0.020</b>     | <b>&lt; 0.001</b> | 0.083            | <i>P</i> -value                                       | <b>0.049</b>      |
| <b>Na_454_03111</b><br>(Defensin)    | <i>F</i> -value | 4.31              | 91.40             | 0.77             | 3.56             | 47.99             | 0.63             | <i>t</i>                                              | 1.07              |
|                                      | df              | 1                 | 1                 | 1                | 1                | 1                 | 1                | df                                                    | 16                |
|                                      | <i>P</i> -value | <b>0.0378</b>     | <b>&lt; 0.001</b> | 0.3812           | 0.0687           | <b>&lt; 0.001</b> | 0.4267           | <i>P</i> -value                                       | 0.299             |
| <b>Na_454_03285</b><br>(NaTD)        | <i>F</i> -value | 0.33              | 1575.45           | 0.00             | 1.30             | 2442.05           | 2.07             | <i>t</i>                                              | -3.39             |
|                                      | df              | 1                 | 1                 | 1                | 1                | 1                 | 1                | df                                                    | 18                |
|                                      | <i>P</i> -value | 0.564             | <b>&lt; 0.001</b> | 0.958            | 0.254            | <b>&lt; 0.001</b> | 0.150            | <i>P</i> -value                                       | <b>0.003</b>      |
| <b>Na_454_06634</b><br>(NaACO2)      | <i>F</i> -value | 0.02              | 331.69            | 1.94             | 0.04             | 1333.01           | 0.07             | <i>t</i>                                              | -6.03             |
|                                      | df              | 1                 | 1                 | 1                | 1                | 1                 | 1                | df                                                    | 13                |
|                                      | <i>P</i> -value | 0.874             | <b>&lt; 0.001</b> | 0.164            | 0.842            | <b>&lt; 0.001</b> | 0.790            | <i>P</i> -value                                       | <b>&lt; 0.001</b> |
| <b>Na_454_12995</b><br>(NaNPR1)      | <i>F</i> -value | 0.02              | 32.59             | 2.78             | 0.03             | 125.27            | 2.63             | <i>t</i>                                              | -3.18             |
|                                      | df              | 1                 | 1                 | 1                | 1                | 1                 | 1                | df                                                    | 15                |
|                                      | <i>P</i> -value | 0.754             | <b>&lt; 0.001</b> | 0.095            | 0.797            | <b>&lt; 0.001</b> | 0.105            | <i>P</i> -value                                       | <b>0.006</b>      |
| <b>Na_454_14052</b><br>(Na_WRKY6)    | <i>F</i> -value | 0.01              | 8.60              | 0.94             | 0.73             | 106.87            | 0.70             | <i>t</i>                                              | -5.43             |
|                                      | df              | 1                 | 1                 | 1                | 1                | 1                 | 1                | df                                                    | 16                |
|                                      | <i>P</i> -value | 0.874             | <b>0.003</b>      | 0.332            | 0.394            | <b>&lt; 0.001</b> | 0.402            | <i>P</i> -value                                       | <b>&lt; 0.001</b> |
| <b>Na_454_15272</b><br>(PRT1)        | <i>F</i> -value | 5.04              | 129.99            | 0.02             | 8.30             | 271.31            | 0.00             | <i>t</i>                                              | -2.98             |
|                                      | df              | 1                 | 1                 | 1                | 1                | 1                 | 1                | df                                                    | 18                |
|                                      | <i>P</i> -value | <b>0.025</b>      | <b>&lt; 0.001</b> | 0.886            | <b>0.004</b>     | <b>&lt; 0.001</b> | 0.960            | <i>P</i> -value                                       | <b>0.008</b>      |
| <b>Na_454_21846</b><br>(WRKY71-like) | <i>F</i> -value | 12.61             | 26.93             | 0.40             | 0.42             | 65.76             | 6.60             | <i>t</i>                                              | -0.46             |
|                                      | df              | 1                 | 1                 | 1                | 1                | 1                 | 1                | df                                                    | 17                |
|                                      | <i>P</i> -value | <b>&lt; 0.001</b> | <b>&lt; 0.001</b> | 0.5289           | 0.5162           | <b>&lt; 0.001</b> | <b>0.0102</b>    | <i>P</i> -value                                       | <b>0.9641</b>     |



**Table S4: Differences between all treatments involving larval feeding in gene expression quantified by qPCR.** We evaluated the effects of feeding and prior oviposition treatments on transcript accumulation of *N. attenuata* genes using a LMM. The replicate blocks were included as random factor. Significant differences are emphasised in bold (N = 9-11). Tukey tests were used to verify differences between the individual treatments. Log<sub>2</sub>-fold changes in gene expression relative to control plants are presented in Fig.7 and Fig. S5.

|                                               |                                               | <i>early</i>           |                 |                 |                 |                 |                 |                       |                 |                 |                 |                    |                 |
|-----------------------------------------------|-----------------------------------------------|------------------------|-----------------|-----------------|-----------------|-----------------|-----------------|-----------------------|-----------------|-----------------|-----------------|--------------------|-----------------|
|                                               |                                               | <i>SAMT</i>            |                 | <i>NaMKK1</i>   |                 | <i>NaACO</i>    |                 | <i>flowering-like</i> |                 | <i>NaTOC1</i>   |                 | <i>JmjC30-like</i> |                 |
|                                               |                                               | <i>F</i> -value        | <i>P</i> -value | <i>F</i> -value | <i>P</i> -value | <i>F</i> -value | <i>P</i> -value | <i>F</i> -value       | <i>P</i> -value | <i>F</i> -value | <i>P</i> -value | <i>F</i> -value    | <i>P</i> -value |
|                                               |                                               | 9.53                   | <0.001          | 7.82            | <0.001          | 9.14            | <0.001          | 3.74                  | 0.002           | 4.84            | <0.001          | 5.11               | <0.001          |
|                                               |                                               | <i>Tukey contrasts</i> |                 |                 |                 |                 |                 |                       |                 |                 |                 |                    |                 |
|                                               |                                               | <i>z</i> -value        | <i>P</i> -value | <i>z</i> -value | <i>P</i> -value | <i>z</i> -value | <i>P</i> -value | <i>z</i> -value       | <i>P</i> -value | <i>z</i> -value | <i>P</i> -value | <i>z</i> -value    | <i>P</i> -value |
| <i>E</i> <sub>0</sub> <i>L</i> <sub>ms</sub>  | <i>E</i> <sub>0</sub> <i>L</i> <sub>se</sub>  | 4.42                   | <0.001          | 4.96            | <0.001          | 4.35            | <0.001          | -1.74                 | 0.507           | -2.65           | 0.086           | -2.91              | 0.042           |
| <i>E</i> <sub>0</sub> <i>L</i> <sub>ms</sub>  | <i>E</i> <sub>se</sub> <i>L</i> <sub>se</sub> | 4.02                   | <0.001          | 4.33            | <0.001          | 3.35            | 0.010           | -2.35                 | 0.175           | -2.08           | 0.299           | -2.71              | 0.074           |
| <i>E</i> <sub>0</sub> <i>L</i> <sub>ms</sub>  | <i>E</i> <sub>ms</sub> <i>L</i> <sub>se</sub> | -2.70                  | 0.076           | -2.70           | 0.075           | -2.14           | 0.269           | -0.26                 | 1.000           | -0.66           | 0.986           | 0.33               | 1.000           |
| <i>E</i> <sub>0</sub> <i>L</i> <sub>ms</sub>  | <i>E</i> <sub>se</sub> <i>L</i> <sub>ms</sub> | 1.44                   | 0.703           | 3.20            | 0.017           | 1.09            | 0.885           | -2.88                 | 0.046           | -2.75           | 0.065           | -3.79              | 0.002           |
| <i>E</i> <sub>0</sub> <i>L</i> <sub>ms</sub>  | <i>E</i> <sub>ms</sub> <i>L</i> <sub>ms</sub> | 1.03                   | 0.910           | -0.66           | 0.986           | 1.43            | 0.707           | -0.03                 | 1.000           | -0.32           | 1.000           | 0.56               | 0.993           |
| <i>E</i> <sub>0</sub> <i>L</i> <sub>se</sub>  | <i>E</i> <sub>se</sub> <i>L</i> <sub>se</sub> | 0.26                   | 1.000           | 0.47            | 0.997           | 0.85            | 0.957           | 0.60                  | 0.991           | -0.62           | 0.990           | -0.20              | 1.000           |
| <i>E</i> <sub>0</sub> <i>L</i> <sub>se</sub>  | <i>E</i> <sub>ms</sub> <i>L</i> <sub>se</sub> | 1.72                   | 0.518           | 2.26            | 0.209           | 2.22            | 0.231           | -1.99                 | 0.347           | -3.27           | 0.014           | -2.59              | 0.100           |
| <i>E</i> <sub>0</sub> <i>L</i> <sub>se</sub>  | <i>E</i> <sub>se</sub> <i>L</i> <sub>ms</sub> | 2.98                   | 0.034           | 1.76            | 0.493           | 3.11            | 0.023           | 1.07                  | 0.894           | -0.04           | 1.000           | 0.78               | 0.970           |
| <i>E</i> <sub>0</sub> <i>L</i> <sub>se</sub>  | <i>E</i> <sub>ms</sub> <i>L</i> <sub>ms</sub> | 5.45                   | <0.001          | 4.30            | <0.001          | 5.78            | <0.001          | -1.72                 | 0.518           | -2.89           | 0.045           | -2.29              | 0.199           |
| <i>E</i> <sub>se</sub> <i>L</i> <sub>ms</sub> | <i>E</i> <sub>ms</sub> <i>L</i> <sub>ms</sub> | 2.46                   | 0.135           | 2.54            | 0.112           | 2.47            | 0.132           | -2.83                 | 0.052           | -3.01           | 0.032           | -3.13              | 0.022           |
| <i>E</i> <sub>ms</sub> <i>L</i> <sub>se</sub> | <i>E</i> <sub>se</sub> <i>L</i> <sub>se</sub> | 1.41                   | 0.723           | 1.72            | 0.519           | 1.29            | 0.792           | -2.60                 | 0.096           | -2.72           | 0.071           | -2.39              | 0.160           |
| <i>E</i> <sub>se</sub> <i>L</i> <sub>ms</sub> | <i>E</i> <sub>se</sub> <i>L</i> <sub>se</sub> | 2.63                   | 0.091           | 1.23            | 0.821           | 2.19            | 0.245           | 0.46                  | 0.998           | 0.60            | 0.991           | 0.99               | 0.923           |
| <i>E</i> <sub>ms</sub> <i>L</i> <sub>se</sub> | <i>E</i> <sub>ms</sub> <i>L</i> <sub>ms</sub> | 3.72                   | 0.003           | 2.04            | 0.321           | 3.57            | 0.005           | 0.23                  | 1.000           | 0.32            | 1.000           | 0.24               | 1.000           |
| <i>E</i> <sub>ms</sub> <i>L</i> <sub>se</sub> | <i>E</i> <sub>se</sub> <i>L</i> <sub>ms</sub> | -1.26                  | 0.807           | 0.51            | 0.996           | -0.97           | 0.927           | -3.14                 | 0.021           | -3.42           | 0.008           | -3.46              | 0.007           |
| <i>E</i> <sub>ms</sub> <i>L</i> <sub>ms</sub> | <i>E</i> <sub>se</sub> <i>L</i> <sub>se</sub> | 5.01                   | <0.001          | 3.69            | 0.003           | 4.73            | <0.001          | -2.32                 | 0.187           | -2.34           | 0.179           | -2.09              | 0.292           |

**Table S5: Annotation and primer information for all genes selected for qPCR analysis.** Sequences of the forward (F) and reversed (R) primers used and E-values of ‘predicted’ gene annotations according to blastx against the NCBI database of non-redundant protein sequences (nr). If available, we used primer sequences that were already used in previous studies. Otherwise we designed primers using the NCBI primer-design tool based on either published sequences of annotated genes or, if not available, on the p454 sequences of BioProject PRJNA223344.

| Oligo ID     | Gene                  | Description / E-value                                                                                               |   | Primer sequence (5'-3')    |
|--------------|-----------------------|---------------------------------------------------------------------------------------------------------------------|---|----------------------------|
| Na_454_00166 | NaLOX3                | <i>N. attenuata</i> lipoxygenase                                                                                    | F | GGCAGTGAAATTCAAAGTAAGAG    |
|              |                       |                                                                                                                     | R | CCCAAAATTTGAATCCACAACA     |
| Na_454_00281 | AO                    | Predicted L-aspartate oxidase <i>Nicotiana sylvestris</i> , E-value 0.0                                             | F | ACATGGAAGTGTGGCTGTGA       |
|              |                       |                                                                                                                     | R | TGAATCCAAAGGGCAGAGCA       |
| Na_454_00283 | NaActin               | <i>N. attenuata</i> β-actin                                                                                         | F | CCGGTATTGTGTTGGACTCTGGTG   |
|              |                       |                                                                                                                     | R | CAGCTGAGGTGGTGAACATGTAACC  |
| Na_454_00786 | NaACO1                | <i>N. attenuata</i> ACC oxidase ACO1                                                                                | F | GCAACTGCATAGATCCAAATTCA    |
|              |                       |                                                                                                                     | R | TGTAGTAGGGACACACGCTT       |
| Na_454_01146 | NaGGPPS2              | <i>N. attenuata</i> geranylgeranyl pyrophosphate synthase                                                           | F | CTGCTGGGATTGGAAAAGGC       |
|              |                       |                                                                                                                     | R | ACACCGTATAGCTCGAAGAA       |
| Na_454_01437 | NaEF1a                | <i>N. attenuata</i> elongation factor 1a                                                                            | F | CCACACTTCCACATTGCTG        |
|              |                       |                                                                                                                     | R | CGCATGTCCCTCACAGCAA        |
| Na_454_02256 | NaTPI                 | <i>N. attenuata</i> 7-domain trypsin inhibitor precursor                                                            | F | CTTTGTCTTGCCTGTAATCTGT     |
|              |                       |                                                                                                                     | R | TGCAGCAAAAGCATCACTAACT     |
| Na_454_03111 | DEF2                  | <i>N. alata</i> NaD1, E-value 2e-51 and <i>N. attenuata</i> DEF2 (Cloning vector pSOL9DEF2) E-value 5e-52           | F | TTTGTTCCTATGAGGTGCAAG      |
|              |                       |                                                                                                                     | R | TCAAACACACATGGCTTAGTGC     |
| Na_454_03285 | NaTD                  | <i>N. attenuata</i> threonine deaminase                                                                             | F | TCTCTGTCAGTGGAAAGCTAGT     |
|              |                       |                                                                                                                     | R | TCCTACTAAAGGTTCTCGGT       |
| Na_454_06634 | NaACO2                | <i>N. attenuata</i> ACC oxidase ACO2b                                                                               | F | TTCTGAGAGAGCTGACACCAT      |
|              |                       |                                                                                                                     | R | CATGCACTTCTTGTAATGTCCCT    |
| Na_454_07924 | Jmj30                 | Predicted lysine-specific demethylase JM30 ( <i>N. attenuata</i> )                                                  | F | CACTATGTCCACGTGACCCA       |
|              |                       |                                                                                                                     | R | TATCCGCCTTCCCTCCGCTAT      |
| Na_454_08320 | SAMT                  | Predicted salicylate carboxymethyltransferase-like ( <i>N. attenuata</i> ) E-value 1e-176                           | F | AGCACGGGTTTCAGTCACCA       |
|              |                       |                                                                                                                     | R | AGTGCAAGCTGTTGGAAGGG       |
| Na_454_09170 | Early flowering 4-... | Predicted Early flowering 4-like protein ( <i>N. attenuata</i> ) E-value 2e-90                                      | F | GAGGTGCAGTCCGGTGTGGA       |
|              |                       |                                                                                                                     | R | ACGCCGTTCTTCCGCTGGTAA      |
| Na_454_09895 | NaTOC1                | <i>N. attenuata</i> TIMING OF CAB EXPRESSION 1/PSEUDO-RESPONSE REGULATOR 1 (TOC1/PRR1)                              | F | TGGTCAACATGCCCAAAATG       |
|              |                       |                                                                                                                     | R | CCCTGTCCAGATTGCTTCTCT      |
| Na_454_10210 | NaMKK1                | <i>N. attenuata</i> MKK1                                                                                            | F | ATCCCGAGATTCCCGTCAA        |
|              |                       |                                                                                                                     | R | TCGAGTGTGCCGGAGTTCAT       |
| Na_454_12995 | NaNPR1                | <i>N. attenuata</i> NPR1                                                                                            | F | AGCCCAATAAGTCCCTTTT        |
|              |                       |                                                                                                                     | R | ACAAGTGTTGTATGTATGTTGAC    |
| Na_454_14052 | NaWRKY6               | <i>N. attenuata</i> WRKY6                                                                                           | F | TCGATGTAATTTATGATAGTTTTGC  |
|              |                       |                                                                                                                     | R | CAAATATCTTAATGGGGAATTACAGC |
| Na_454_15271 | NTR1/PTR              | Predicted protein NRT1/ PTR FAMILY 6.3-like ( <i>Nicotiana tomentosiformis</i> ), E-value 2e-71                     | F | TGGGCTAGTGGTGAATGAT        |
|              |                       |                                                                                                                     | R | TGGCTGAAGAAGCATTCCCT       |
| Na_454_21846 | WRKY 71               | Predicted WRKY transcription factor 71 ( <i>N. sylvestris</i> ), E-value 5e-76                                      | F | TGGCTCATTTACGCAATCAA       |
|              |                       |                                                                                                                     | R | ACGAAGAGTTGCCGGACAAT       |
| Na_454_29412 | PLX2                  | Predicted leucine-rich repeat receptor-like protein kinase PXL2 ( <i>Nicotiana tomentosiformis</i> ) E-value 3e-121 | F | ACTCCAAAGGTGCAGTTGAGA      |
|              |                       |                                                                                                                     | R | TGCTGACATTCCAAGACCCA       |
